# Supplementary material
Source: Springer Nature journal article supplement (https://www.springermedizin.de/resource/supplementary/12963_2012_211_MOESM3_ESM.pdf/9572406)

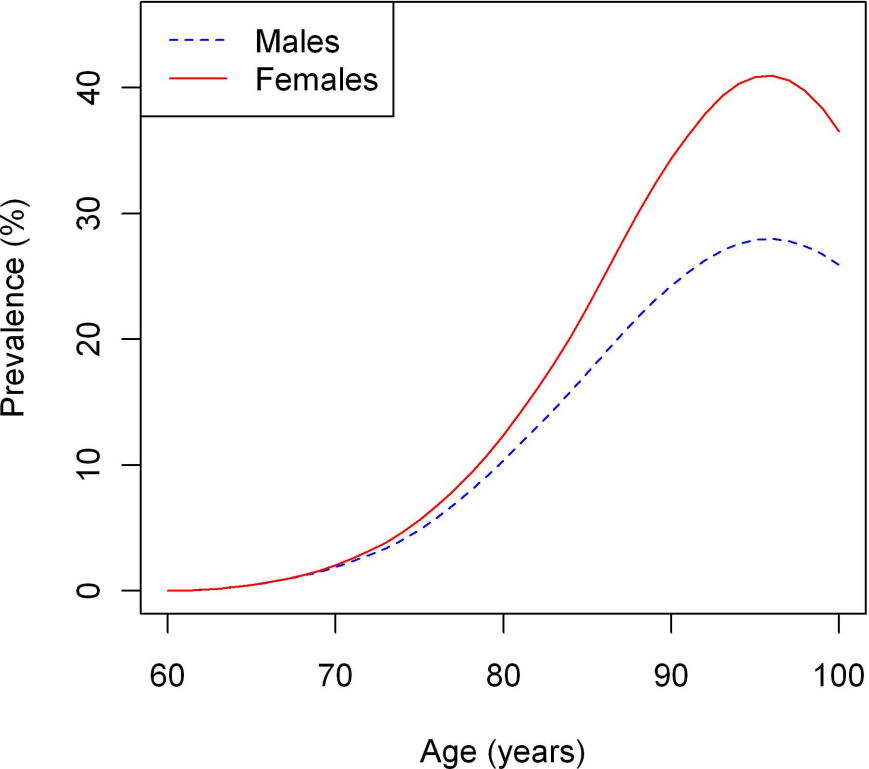

Supplement: MOESM3 [file 9572406]
